# Supplementary material
Source: publisher site journal article supplement (https://www.dovepress.com/get_supplementary_file.php?f=354057.docx)
Supplement: Supplementary file 1 [file get_supplementary_file.php]

**Supplementary Table1** The comparison of the characteristics and the risk factors between the hypertensive and non-hypertensive population in the derivation group

| Variables | Hypertensive  (N=503) | | Non-hypertensive  (N =1070) | *P* value |
| --- | --- | --- | --- | --- |
| Age (n,%) |  |  | | <0.001 |
| <60 years | 102(20.3) | | 604(56.4) |  |
| ≥60 years | 401(79.7) | | 466(43.6) |  |
| Sex (n,%) |  | |  | 0.388 |
| Male | 226(44.9) | | 456(42.6) |  |
| Female | 277(55.1) | | 614(57.4) |  |
| Educational level (n,%) |  | |  | <0.001 |
| Junior high school or below | 291(57.9) | | 449(42.0) |  |
| high school or above | 212(42.1) | | 621(58.0) |  |
| Marital status (n,%) |  | |  | 0.566 |
| Single | 77(15.3) | | 176(16.4) |  |
| Married | 426(84.7) | | 894(83.6) |  |
| Smoking (n,%) |  | |  | 0.010 |
| Never | 361(71.8) | | 814(76.1) |  |
| Previous smoker | 43(8.5) | | 54(5.0) |  |
| Smoking but not every day | 5(1.0) | | 24(2.2) |  |
| Smoking every day | 94(18.7) | | 178(16.6) |  |
| Frequency of drinking alcohol (n,%) |  | |  | 0.612 |
| Never | 455(90.5) | | 976(91.2) |  |
| <1 day a month | 16(3.2) | | 30(2.8) |  |
| 1-3 days a month | 14(2.8) | | 18(1.7) |  |
| 1-4 days a week | 9(1.8) | | 24(2.2) |  |
| ≥5 days a week | 9(1.8) | | 22(2.1) |  |
| Average frequency of consumption of meat in a week (n,%) |  | |  | 0.918 |
| < once per day | 389(77.3) | | 825(77.1) |  |
| ≥ once per day | 114(22.7) | | 245(22.9) |  |
| Average frequency of consumption of vegetables in a week (n,%) |  | |  | 0.322 |
| < once per day | 22(4.4) | | 36(3.4) |  |
| ≥ once per day | 481(95.6) | | 1034(96.6) |  |
| Average frequency of consumption of fresh fruits in a week (n,%) |  | |  | 0.569 |
| < once per day | 178(35.4) | | 363(33.9) |  |
| ≥ once per day | 325(64.6) | | 707(66.1) |  |
| Salt intake (n,%) |  | |  | 0.006 |
| High | 73(14.5) | | 122(11.4) |  |
| Moderate | 302(60.0) | | 730(68.2) |  |
| Low | 128(25.4) | | 218(20.4) |  |
| Family history of hypertension (n,%) |  | |  | <0.001 |
| No | 139(27.6) | | 607(56.7) |  |
| Yes | 364(72.4) | | 463(43.3) |  |
| Having diabetes (n,%) |  | |  | <0.001 |
| No | 398(79.1) | | 987(92.2) |  |
| Yes | 105(20.9) | | 83(7.8) |  |
| Having dyslipidemia (n,%) |  | |  | <0.001 |
| No | 370(73.6) | | 965(90.2) |  |
| Yes | 133(26.4) | | 105(9.8) |  |
| Sleep quality (n,%) |  | |  | 0.021 |
| Good | 474(94.2) | | 1039(97.1) |  |
| Medium | 11(2.2) | | 11(1.0) |  |
| Poor | 18(3.6) | | 20(1.9) |  |
| BMI (n,%) |  | |  | <0.001 |
| <24Kg/m2 | 157(31.2) | | 653(61.0) |  |
| ≥24 Kg/m2 | 346(68.8) | | 417(39.0) |  |
| Abdominal obesity (n,%) |  | |  | <0.001 |
| No | 244(48.5) | | 795(74.3) |  |
| Yes | 259(51.5) | | 275(25.7) |  |

**Notes:** BMI, body mass index.
